# Supplementary material
Source: ML conference proceedings conference paper supplement (https://openaccess.thecvf.com/content/CVPR2023/html/Pippi_Handwritten_Text_Generation_CVPR_2023_paper.html)
Supplement: Supplementary file 1 [file Pippi_Handwritten_Text_Generation_CVPR_2023_supplemental.pdf]

# Handwritten Text Generation from Visual Archetypes Supplementary Material

Vittorio Pippi, Silvia Cascianelli, Rita Cucchiara  
University of Modena and Reggio Emilia  
Via Pietro Vivarelli, 10, Modena (Italy)  
{name.surname}@unimore.it

In this document, we present additional experimental analysis of our proposed approach for Few-Shot HTG, VATr. In particular, we show an ablation analysis on the role of each of the used loss terms in §1; additional details about the synthetic pre-training dataset in §2; additional qualitative results in §3; a comparison of the charsets generated in different styles in §4; further analysis of the long-tail characters generation scenario in §5; examples of the generation of some out-of-charset characters from other alphabets in §6; and some HTR results obtained by training both on real and VATr-generated images in §6.

## 1. Role of the Loss Function Terms

We analyze the effect of each loss term, both quantitatively and qualitatively. The results of this study are reported in Table 1 and show that our model needs the included regularization terms to be trained properly. Moreover, when none of the two terms enforcing handwriting style faithfulness (*i.e.*, the writer classification loss  $L_{class}$  and the cycle loss  $L_{cycle}$ ) is used, VATr generates images of readable words but does not render the style of the reference images. Conversely, when the text recognition loss  $L_{HTR}$  is not employed, it renders "scrabbles" whose overall appearance resembles that of the reference style images.

## 2. Synthetic Pre-training Dataset

The synthetic dataset used to pre-train the convolutional backbone of the encoder is obtained by combining calligraphic fonts and words to generate word images. The process involves selecting 10 400 fonts from dedicated websites, ensuring that fonts with small caps and decorative elements such as hearts or stars are discarded. Next, 10 400 words of varying lengths are randomly chosen from the English vocabulary. All possible combinations between the selected fonts and words are then rendered, resulting in a total of  $10\,400 \times 10\,400 = 108\,160\,000$  word images. Some exemplar images are reported in Figure 1.

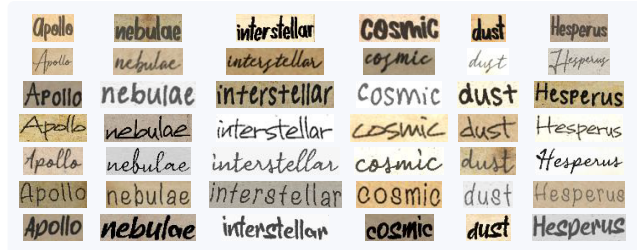

Figure 1. Exemplar images from the synthetic dataset used for pre-training the style encoder.

## 3. Additional Styled HTG Qualitative Results

In Figures 2-5, we report qualitative examples of images generated with the proposed VATr compared to GANwriting [6] and HWT [1] in the four styled generation IV-S, IV-U, OOV-S, and OOV-U scenarios, respectively. It can be noticed that the style fidelity in the images produced by VATr does not deteriorate significantly when the style examples are unseen compared with the case in which they have been seen in training. It can be also noticed that VATr consistently disregards the background while reproducing the style, while the HWT competitor reproduces the background artifacts, especially in the unseen style scenarios.

## 4. Styled Charsets Generation

In Figure 6, we report qualitative examples of styled generation of the characters in the IAM dataset, sorted by the frequency in which they appear in the training set. Also in this case, we compare VATr against HWT and GANwriting, which have all been trained on the same data. It has to be noted that, by design, GANwriting cannot generate characters that are not letters. On the other hand, HWT includes also punctuation and digits in its charset. Nonetheless, it can be noticed that VATr generates images for a larger number of characters, including long-tail ones, with which both the competitors struggle.

## IV-S scenario

|                                                                                                                        |                                                                                                                                                                                                                                                                                                                                                  |
|------------------------------------------------------------------------------------------------------------------------|--------------------------------------------------------------------------------------------------------------------------------------------------------------------------------------------------------------------------------------------------------------------------------------------------------------------------------------------------|
| <p>Style examples</p> <p><i>the Labour movement in<br/>   he said he felt sure<br/>of General and Workers</i></p>      | <p>Addressing the annual congress of the National Union of General</p> <p>VATr <i>Addressing the annual congress of the National Union of General</i></p> <p>HWT <i>Addressing the annual congress of the National Union of General</i></p> <p>GANwriting <i>Address the annual congres of the Nationa Union of General</i></p>                  |
| <p>Style examples</p> <p><i>red mist veiled her face<br/>and it was as though a<br/>Nigel's part she had   </i></p>    | <p>But after that slight slip of the tongue on Nigels part she had</p> <p>VATr <i>But after that slight slip of the tongue on Nigels part she had</i></p> <p>HWT <i>But after that slight slip of the tongue on Nigels part she had</i></p> <p>GANwriting <i>But after that slight slip of the tongue on Nigels part she had</i></p>             |
| <p>Style examples</p> <p><i>copy of German in his<br/>been frozen    Mr. the<br/>For nearly a year has</i></p>         | <p>Banks have paid in a first instalment of almost in response to the</p> <p>VATr <i>Banks have paid in a first instalment of almost in response to the</i></p> <p>HWT <i>Banks have paid in a first instalment of almost in response to the</i></p> <p>GANwriting <i>Banks have paid in a first instalment of almost in response to the</i></p> |
| <p>Style examples</p> <p><i>mind    She       younger<br/>has quite a mission in<br/>firmation)       she also</i></p> | <p>The girl is a knockout see pic ture of Julie Newmar for con She</p> <p>VATr <i>The girl is a knockout see pic ture of Julie Newmar for con She</i></p> <p>HWT <i>The girl is a knockout see pic ture of Julie Newmar for con She</i></p> <p>GANwriting <i>The girl is a knocko ' see pic ture of Julie Newmar for con She</i></p>             |
| <p>Style examples</p> <p><i>hour after hour it out<br/>   proclaimed the 1 and<br/>   THIS is colour dog   </i></p>    | <p>The dinner table is the best answer to the grumblers in Britain</p> <p>VATr <i>The dinner table is the best answer to the grumblers in Britain</i></p> <p>HWT <i>The dinner table is the best answer to the grumblers in Britain</i></p> <p>GANwriting <i>The dinner table is the best answer to the grumble in Britain</i></p>               |
| <p>Style examples</p> <p><i>defeat a CENSURE ON   <br/>in ANSWERS to their to<br/>the Tories were massed</i></p>       | <p>The result of the vote was not in doubt For the Tories were massed</p> <p>VATr <i>The result of the vote was not in doubt For the Tories were massed</i></p> <p>HWT <i>The result of the vote was not in doubt For the Tories were massed</i></p> <p>GANwriting <i>The result of the vote was not in doubt For the Tories were massed</i></p> |

Figure 2. Exemplar qualitative results of styled text generation for the IV-S setting on the IAM dataset.

## IV-U scenario

|                                                                                                                               |                                                                                                                                                                                                                                                                                                                                  |
|-------------------------------------------------------------------------------------------------------------------------------|----------------------------------------------------------------------------------------------------------------------------------------------------------------------------------------------------------------------------------------------------------------------------------------------------------------------------------|
| <p>Style examples</p> <p>A mistake about me / /<br/>           I I guess saddy made<br/>           accepted ds inevitable</p> | <p>Sometimes she took Harry around with her but never her husband a</p> <p>VATr Sometimes she took Harry around with her but never her husband a</p> <p>HWT Sometimes she took Harry around with her but never her husband a</p> <p>GANwriting Sometim she took Harry around with her ' but never her husband ' a</p>            |
| <p>Style examples</p> <p>establish any one text<br/>           It is not possible to<br/>           A modern text of the</p>  | <p>THE Fourth Gospel was almost certainly written in Greek A modern</p> <p>VATr THE Fourth Gospel was almost certainly written in Greek A modern</p> <p>HWT THE Fourth Gospel was almost certainly written in Greek A modern</p> <p>GANwriting The Fourth Gospel was almost certain written in Greek ' A modern</p>              |
| <p>Style examples</p> <p>anyway NUF RA. / /<br/>           my had. / / / / / / /<br/>           it wasn't Nigel you</p>       | <p>No she told Phil Gubbins a junior houseman it wasn't Nigel you saw</p> <p>VATr No she told Phil Gubbins a junior houseman it wasn't Nigel you saw</p> <p>HWT No she told Phil Gubbins a junior houseman it wasn't Nigel you saw</p> <p>GANwriting ' No ' she told Phil Gubbins a junior housema ' it wasn't Nigel you saw</p> |
| <p>Style examples</p> <p>He peered as it were<br/>           And the nukes didn't<br/>           carefully casual / / ?</p>   | <p>Something s up said Lord Undertone carefully casual The servants</p> <p>VATr Something s up said Lord Undertone carefully casual The servants</p> <p>HWT Something s up said Lord Undertone carefully casual The servants</p> <p>GANwriting ' Somethi s up ' ' said Lord underto ' careful casual ' ' The servant</p>         |
| <p>Style examples</p> <p>clutched her heart was<br/>           A cold hand seeming to<br/>           strike and taken it</p>  | <p>Gay thanked him and walked out on to the terrace thinking that</p> <p>VATr Gay thanked him and walked out on to the terrace thinking that</p> <p>HWT Gay thanked him and walked out on to the terrace thinking that</p> <p>GANwriting Gay thanked him and walked out on to the terrace thinkin that</p>                       |
| <p>Style examples</p> <p>engaged. / to the man<br/>           back in her bag Was<br/>           the letter for it</p>        | <p>No other news except that Elaine is engaged and going to marry a</p> <p>VATr No other news except that Elaine is engaged and going to marry a</p> <p>HWT No other news except that Elaine is engaged and going to marry a</p> <p>GANwriting No other news except that Elaine is engaged and going to marry a</p>              |

Figure 3. Exemplar qualitative results of styled text generation for the IV-U setting on the IAM dataset.

OOV-S scenario

|                                                                                                           |                                          |                                                                                                                                                                                                                                  |
|-----------------------------------------------------------------------------------------------------------|------------------------------------------|----------------------------------------------------------------------------------------------------------------------------------------------------------------------------------------------------------------------------------|
| <p>Style examples</p> <p>numbers to use with :<br/>These are the correct<br/>To ensure the / it</p>       | <p>VATr</p> <p>HWT</p> <p>GANwriting</p> | <p>finned voter Jacobs calmly hip clubs quintet blunts Grazie Barton</p> <p>finned voter Jacobs calmly hip clubs quintet blunts Grazie Barton</p> <p>finned voter Jacobs calmly hip clubs quintet blunts Grazie Barton</p>       |
| <p>Style examples</p> <p>the scheme Profits<br/>Guy Eden writes : On<br/>Wilson's offer 'EV' in mind.</p> | <p>VATr</p> <p>HWT</p> <p>GANwriting</p> | <p>turtles audible Woodrow retreat Orders Conlow hobby skin tally</p> <p>turtles audible Woodrow retreat Orders Conlow hobby skin tally</p> <p>turtles audible Woodrow retreat Orders Conlow hobby skin tally</p>                |
| <p>Style examples</p> <p>tinkle and a Hud from<br/>good look round A<br/>and you know how she A</p>       | <p>VATr</p> <p>HWT</p> <p>GANwriting</p> | <p>weakly upriver Newsom Meeker weed fiscal Diane Errors Mig biz Drink</p> <p>weakly upriver Newsom Meeker weed fiscal Diane Errors Mig biz Drink</p> <p>weakly upriver Newsom Meeker weed fiscal Diane Errors Mig biz Drink</p> |
| <p>Style examples</p> <p>just as inevitably<br/>there in July when<br/>tradition and arrives</p>          | <p>VATr</p> <p>HWT</p> <p>GANwriting</p> | <p>nagged ribbing hunt AA Pohly trial saws popped aloof Ceramic thong</p> <p>nagged ribbing hunt AA Pohly trial saws popped aloof Ceramic thong</p> <p>nagged ribbing hunt AA Pohly trial saws popped aloof Ceramic thong</p>    |
| <p>Style examples</p> <p>mind She a younger<br/>has quite a mission in<br/>firmation) S he also</p>       | <p>VATr</p> <p>HWT</p> <p>GANwriting</p> | <p>suffuse muffins Miners Cabrini weakly upriver Newsom Meeker weed</p> <p>suffuse muffins Miners Cabrini weakly upriver Newsom Meeker weed</p> <p>suffuse muffins Miners Cabrini weakly upriver Newsom Meeker weed</p>          |
| <p>Style examples</p> <p>An attempt to get more<br/>There General de had<br/>the British Prime of</p>     | <p>VATr</p> <p>HWT</p> <p>GANwriting</p> | <p>upriver Newsom Meeker weed fiscal Diane Errors Mig biz Drink chop</p> <p>upriver Newsom Meeker weed fiscal Diane Errors Mig biz Drink chop</p> <p>upriver Newsom Meeker weed fiscal Diane Errors Mig biz Drink chop</p>       |

Figure 4. Exemplar qualitative results of styled text generation for the OOV-S setting on the IAM dataset.

OOV-U scenario

|                                                                                                              |                                                                                                                                                                                                                                                                                                                                    |
|--------------------------------------------------------------------------------------------------------------|------------------------------------------------------------------------------------------------------------------------------------------------------------------------------------------------------------------------------------------------------------------------------------------------------------------------------------|
| <p>Style examples</p> <p>When Achilles gave a a<br/>roasting and boiling<br/>cooking meat except by</p>      | <p>sexy humming cheated lick grades heroic Clever foul mood warrior</p> <p>VATr sexy humming cheated lick grades heroic Clever foul mood warrior</p> <p>HWT sexy humming cheated lick grades heroic Clever foul mood warrior</p> <p>GANwriting sexy humming cheated lick grades heroic Clever foul mood warrior</p>                |
| <p>Style examples</p> <p>A mistake about me / /<br/>if I guess sadly made<br/>accepted ds inevitable</p>     | <p>Babin optimum Leyden enrage induces newel trim bolts frog cinder</p> <p>VATr Babin optimum Leyden enrage induces newel trim bolts frog cinder</p> <p>HWT Babin optimum Leyden enrage induces newel trim bolts frog cinder</p> <p>GANwriting Babin optimum Leyden enrage induces newel trim bolts frog cinder</p>                |
| <p>Style examples</p> <p>King Koolha of Koolha of<br/>cypress in the back of<br/>national yonic-go do oh</p> | <p>noon hoes Seafood yuh Mostly seeds bestow acetate jokers waning</p> <p>VATr noon hoes Seafood yuh Mostly seeds bestow acetate jokers waning</p> <p>HWT noon hoes Seafood yuh Mostly seeds bestow acetate jokers waning</p> <p>GANwriting noon hoes Seafood yuh Mostly seeds bestow acetate jokers waning</p>                    |
| <p>Style examples</p> <p>and here he was bland<br/>be met with violent<br/>vengeance She had to</p>          | <p>sacker comest tense par fiend Soiree voted Putting pansy doormen</p> <p>VATr sacker comest tense par fiend Soiree voted Putting pansy doormen</p> <p>HWT sacker comest tense par fiend Soiree voted Putting pansy doormen</p> <p>GANwriting sacker comest tense par fiend Soiree voted Putting pansy doormen</p>                |
| <p>Style examples</p> <p>fringing of dummy and<br/>mankl- piece covers a<br/>the overcrowded and</p>         | <p>blunts Grazie Barton NAB specie Fonta narrow Swan denials Rawson</p> <p>VATr blunts Grazie Barton NAB specie Fonta narrow Swan denials Rawson</p> <p>HWT blunts Grazie Barton NAB specie Fonta narrow Swan denials Rawson</p> <p>GANwriting blunts Grazie Barton NAB specie Fonta narrow Swan denials Rawson</p>                |
| <p>Style examples</p> <p>They will think of the<br/>Help will not be for<br/>the midst of plenty</p>         | <p>Whisky super screwed Flower salads Glow Vapor Married recieve push</p> <p>VATr Whisky super screwed Flower salads Glow Vapor Married recieve push</p> <p>HWT Whisky super screwed Flower salads Glow Vapor Married recieve push</p> <p>GANwriting Whisky super screwed Flower salads Glow Vapor Married recieve handle push</p> |

Figure 5. Exemplar qualitative results of styled text generation for the OOV-U setting on the IAM dataset.

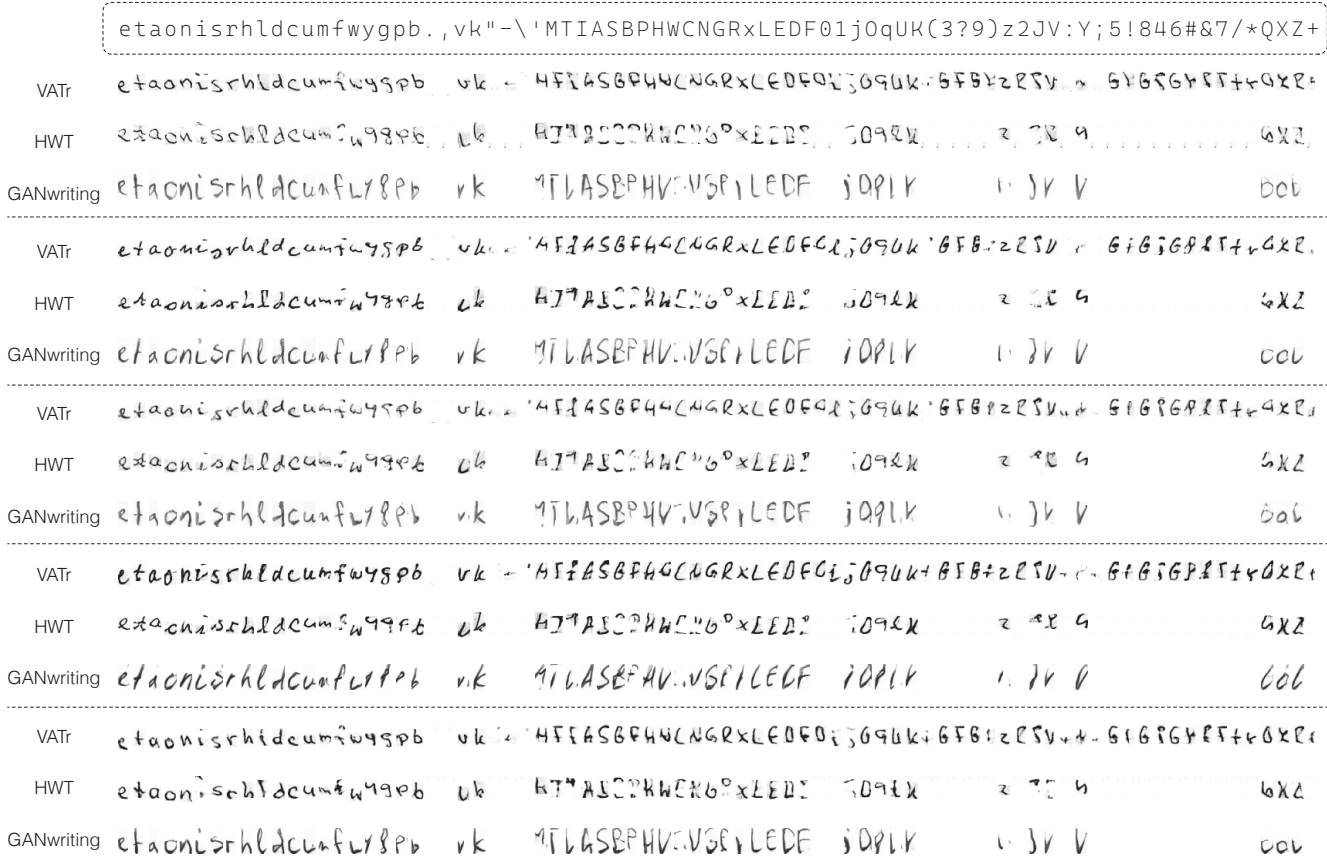

Figure 6. Exemplar IAM charsets generated in different styles sorted by frequency.

Table 1. Ablation analysis on the loss terms. The qualitative examples refer to the generation of the word *that* in two different styles (indicated on top).

| $L_{adv}$ | $L_{HTR}$ | $L_{class}$ | $L_{cycle}$ | FID    | writer      | aspect      |
|-----------|-----------|-------------|-------------|--------|-------------|-------------|
| ✓         |           |             |             | 224.87 |             |             |
| ✓         |           |             | ✓           | 261.23 |             |             |
| ✓         |           | ✓           |             | 255.11 |             |             |
| ✓         |           | ✓           | ✓           | 220.83 |             |             |
| ✓         | ✓         |             |             | 46.61  | <i>that</i> | <i>that</i> |
| ✓         | ✓         |             | ✓           | 41.68  | <i>that</i> | <i>that</i> |
| ✓         | ✓         | ✓           |             | 18.70  | <i>that</i> | <i>that</i> |
| ✓         | ✓         | ✓           | ✓           | 17.79  | <i>that</i> | <i>that</i> |

## 5. Additional Long-tail Character Generation Results

We deepen our analysis on the generation of test words containing rare characters in Figure 7, where we compare VATr against HWT in terms of the FID obtained by changing the Long-tail threshold. This is the value of the frequency of appearance in the training set for which a character can be considered as long-tail. Recall that in the experi-

ments in the main paper we set this threshold to 1000, which was determined by observing the character distribution in the IAM training set, reported both in logarithmic and linear scale in Figure 8. It can be noticed that the FID obtained by VATr is generally lower than that obtained by HWT, especially at lower threshold values. This demonstrates the robustness of our approach of exploiting dense representations of the characters, compared to resorting to one-hot vectors. It can be noticed an increase in the FID of both approaches when the threshold is around 3500. Setting the threshold to this value means excluding almost all the words containing only small letters. Afterward, the percentage of capital letters, digits, and punctuation becomes higher than that of small letters in the generated words. Thus, the capacity to faithfully generate also those symbols is more relevant for those words.

## 6. Additional Out-of-Charset results

In Figure 9, we report examples of the generation of out-of-charset characters from non-Latin alphabets (Greek and Coptic) with our proposed approach. Despite this setting being beyond the scope of our work, it can be noticed that VATr is able to reproduce symbols that are not present in

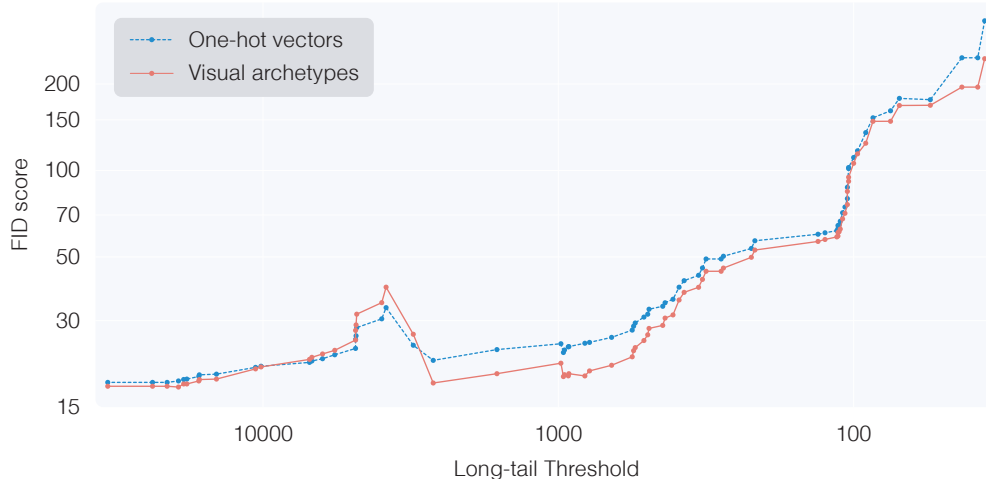

Figure 7. FID score on words containing long-tail characters with respect to the threshold set to consider a character as rare in the IAM dataset (the x-axis is in logarithmic scale).

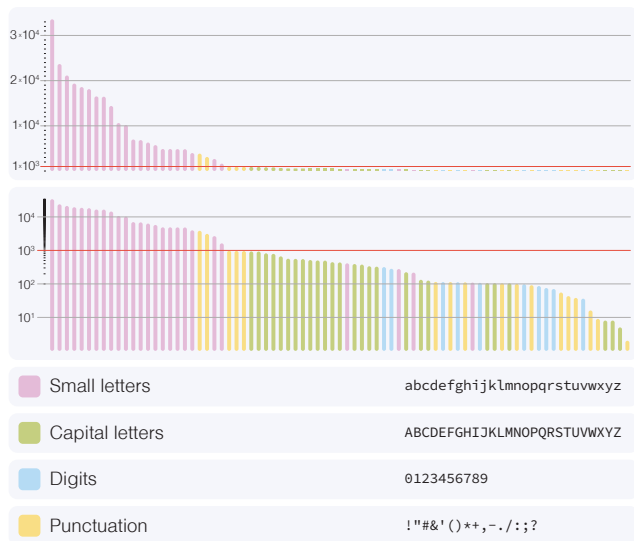

Figure 8. Distribution and classification of the characters in the training set of the IAM dataset in linear scale (top) and logarithmic scale (bottom).

its training set, especially in the case these are geometrically similar to in-charset symbols. In fact, when generating Greek letters that are close to Latin ones starting from their respective visual archetypes, VATr can exploit learned geometric regularities. On the other hand, it struggles to generate characters from the Copto alphabet, whose visual archetypes are very different from those of Latin letters.

## 7. Styled HTG for HTR

One of the main applications of styled HTG is providing training data for HTR models to be applied to writer-

Table 2. Performace comparison of an HTR model trained on real data only and on a combination of real and generated styled text images (obtained with our approach and the SotA HWT approach) on two writer-specific datasets.

|             | Saint Gall |             | Washington |             |
|-------------|------------|-------------|------------|-------------|
|             | CER        | WER         | CER        | WER         |
| Real        | <b>4.5</b> | 32.5        | 3.4        | 15.9        |
| HWT + Real  | 4.6        | 31.2        | 3.7        | 16.5        |
| VATr + Real | <b>4.5</b> | <b>30.9</b> | <b>3.0</b> | <b>13.1</b> |

specific manuscripts. To assess the potential benefits of this strategy when using VATr to improve an HTR model in this setting, we consider the interesting case of two low-resource single-author HTR datasets (Saint Gall [4] and Washington [5]<sup>1</sup>) and generate synthetic training lines with VATr. We then use these as additional samples to train a SotA HTR model [2, 3] and compare the transcription results against a baseline not exploiting synthetic data and the baseline exploiting synthetic data generated with the one-hot vectors-based HWT [1]. These results are reported in Table 2, expressed in terms of Character Error Rate (CER) and Word Error Rate (WER). It can be observed that training on VATr-generated images reduces the errors *w.r.t.* both the compared approaches, especially in terms of WER. This suggests that the misrecognized characters are more concentrated in single words.

<sup>1</sup><https://fki.tic.heia-fr.ch/databases/iam-historical-document-database>

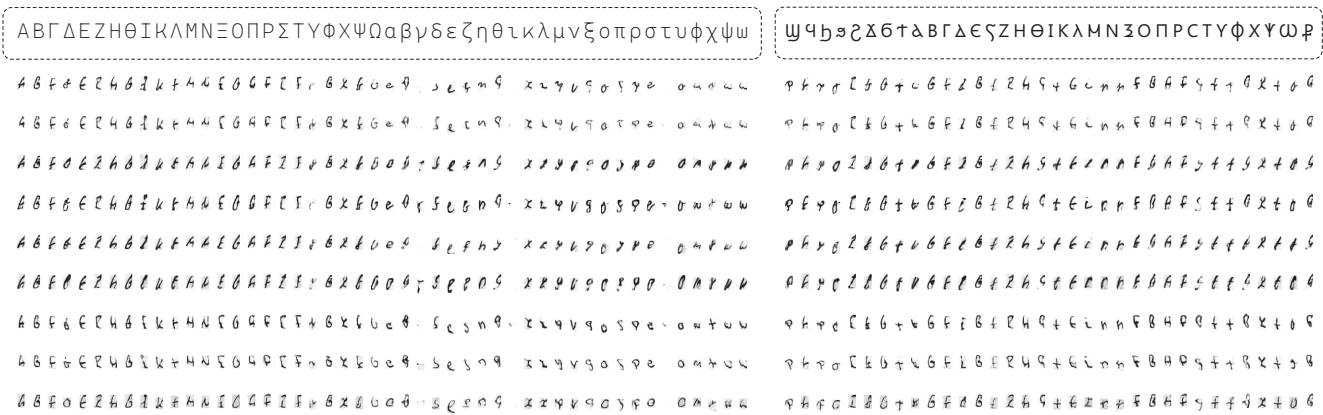

Figure 9. Exemplar out-of-charset symbols generated in different styles. The alphabets used are Greek (left) and Coptic (right).

### References

[1] Ankan Kumar Bhunia, Salman Khan, Hisham Cholakkal, Rao Muhammad Anwer, Fahad Shahbaz Khan, and Mubarak Shah. Handwriting Transformers. In *ICCV*, 2021. 1, 7

[2] Silvia Cascianelli, Marcella Cornia, Lorenzo Baraldi, Rita Cucchiara, et al. Boosting Modern and Historical Handwritten Text Recognition with Deformable Convolutions. *IJDAR*, pages 1–15, 2022. 7

[3] Iulian Cojocaru, Silvia Cascianelli, Lorenzo Baraldi, Massimiliano Corsini, and Rita Cucchiara. Watch your strokes: Improving handwritten text recognition with deformable convolutions. In *ICPR*, 2020. 7

[4] Andreas Fischer, Volkmar Frinken, Alicia Fornés, and Horst Bunke. Transcription alignment of Latin manuscripts using hidden Markov models. In *HIP*, 2011. 7

[5] Andreas Fischer, Andreas Keller, Volkmar Frinken, and Horst Bunke. Lexicon-free handwritten word spotting using character HMMs. *Pattern Recognition Letters*, 33(7):934–942, 2012. 7

[6] Lei Kang, Pau Riba, Yaxing Wang, Marçal Rusiñol, Alicia Fornés, and Mauricio Villegas. GANwriting: Content-Conditioned Generation of Styled Handwritten Word Images. In *ECCV*, 2020. 1
